# Supplementary material for: Associations between cervical intraepithelial neoplasia during pregnancy, previous excisional treatment, cone-length and preterm delivery: a register-based study from western Sweden
Source: Springer Nature journal article supplement (doi:10.1186/s12916-022-02276-6), 2022-02-22
Supplement: MOESM1 [file 20157458]

Figure S1

a) and b) Definition of cone-length

c) and d) Standardized measurement of cone-length before fixation in Sweden:

a)

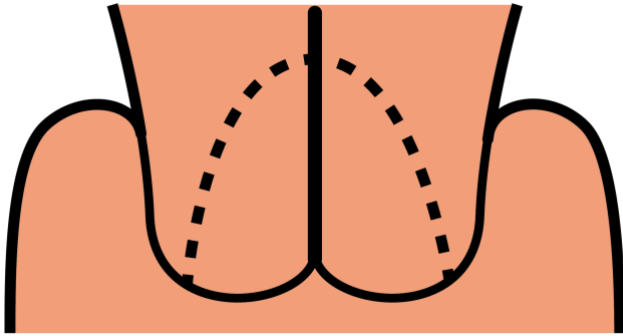

b)

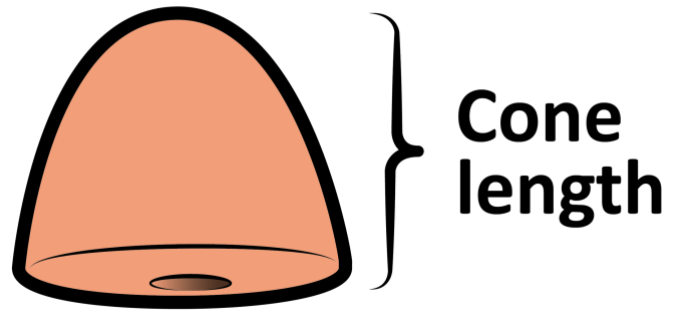

The distance from the external margin to the internal margin of the excised specimen.

c)

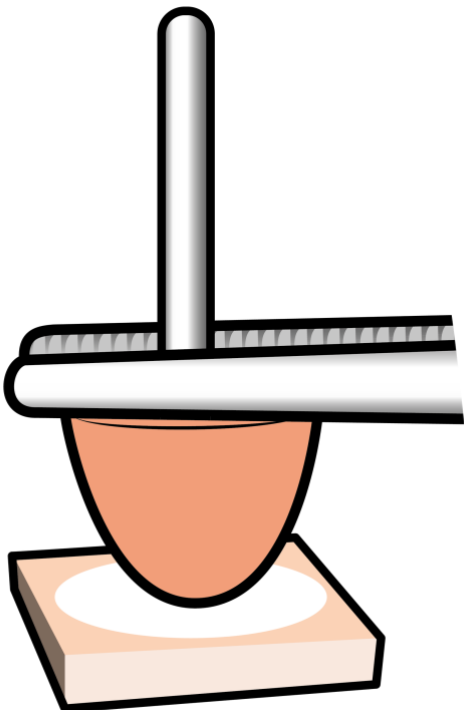

d)

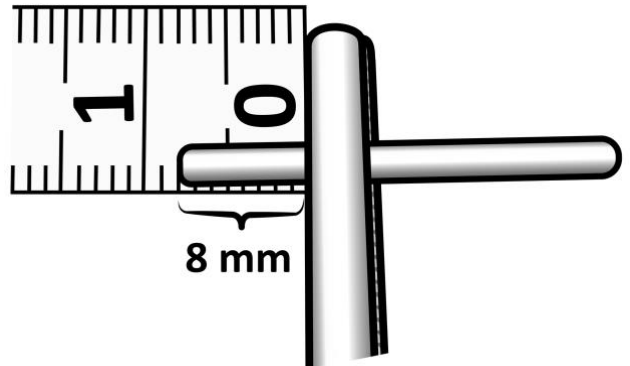

The length of the metal pin enclosed in the specimen is measured.

Cone-length is measured by the colposcopist before cutting, montage and fixation in formalin. The endocervical resection area is placed on flat material. A metal pin is placed in the cervical canal. A vertical forceps is placed at the outer cervical os without pressure
